# Supplementary material
Source: PubMed Central journal article supplement (PMC6054444)
Supplement: NIHMS980308-supplement-supplement_1.pdf [file NIHMS980308-supplement-supplement_1.pdf]

## Appendix 1

Table S1

Posterior Probability of Assignment (PPA) of the 4-Group Joint Trajectory Models of Cognition and Frailty

| Assigned Trajectory Group Based on the Maximal PPA* | Average PPA According to the 4 Fitted Joint Trajectory Groups |                                                |                                                 |                   |
|-----------------------------------------------------|---------------------------------------------------------------|------------------------------------------------|-------------------------------------------------|-------------------|
|                                                     | No Cognitive Frailty                                          | Slow Cognitive Decline and Progressive Frailty | Rapid Cognitive Decline and Progressive Frailty | Cognitive Frailty |
| No cognitive frailty                                | <b>.92</b>                                                    | .08                                            | .004                                            | .00               |
| Slow cognitive decline and progressive frailty      | .04                                                           | <b>.90</b>                                     | .06                                             | .001              |
| Rapid cognitive decline and progressive frailty     | .001                                                          | .08                                            | <b>.91</b>                                      | .01               |
| Cognitive frailty                                   | .00                                                           | .001                                           | .04                                             | <b>.96</b>        |

\*Based on the maximal PPA, a person was assigned to different joint trajectory groups. Bolded values represent the average PPA for those with maximal PPA for a specific joint trajectory group.

## Appendix 2

Table S2

Estimated Joint Trajectory Groups and Group-Specific Growth Parameters

|                                                        | No Cognitive Frailty | Slow Cognitive Decline and Progressive Frailty | Rapid Cognitive Decline and Progressive Frailty | Cognitive Frailty |
|--------------------------------------------------------|----------------------|------------------------------------------------|-------------------------------------------------|-------------------|
| Predicted group probability (%)                        | 27.8                 | 45.5                                           | 20.2                                            | 6.5               |
| Growth parameter                                       |                      |                                                |                                                 |                   |
| Cognition (MMSE score), censored normal model          |                      |                                                |                                                 |                   |
| Intercept                                              | 28.36***             | 27.62***                                       | 24.18***                                        | 29.60***          |
| Linear term                                            | -0.09                | -0.02                                          | 1.00***                                         | -5.79***          |
| Quadratic term                                         | 0.006                | -0.05*                                         | -0.39***                                        | 0.28***           |
| Frailty (Fried phenotype), zero-inflated Poisson model |                      |                                                |                                                 |                   |
| Intercept                                              | -0.92***             | 0.59***                                        | 0.73***                                         | 0.78***           |
| Linear term                                            | 0.16***              | 0.09***                                        | 0.08***                                         | 0.10***           |
| Model fit statistics                                   |                      |                                                |                                                 |                   |
| Bayesian information criterion                         | -15574.2             |                                                |                                                 |                   |

MMSE, Mini-Mental State Examination.

\* $P < .05$ , \*\* $P < .01$ , and \*\*\* $P < .001$ .

Appendix 3

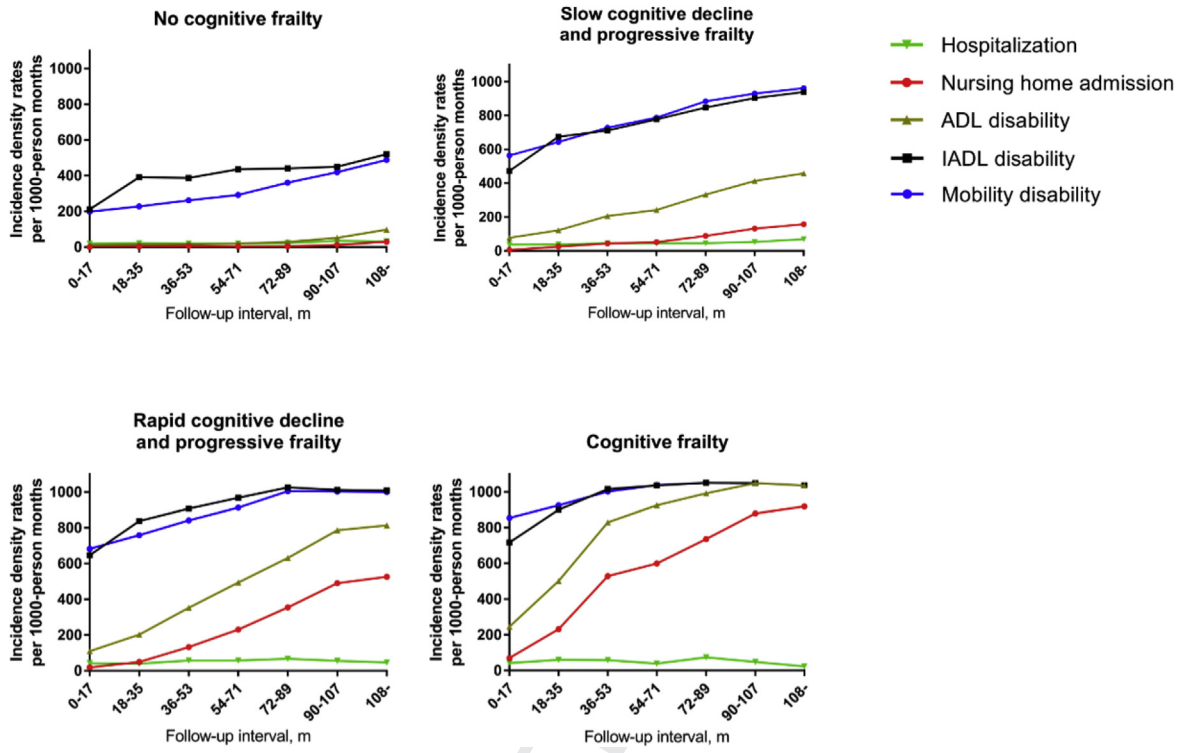

Figure S1. Observed incidence density rates of hospitalization, nursing home admission, and disability over seven 18-month intervals by the joint trajectories. Values represent observed number of events per 1000 person-months for each patient-reported outcome. ADL, activities of daily living; IADL, instrumental activities of daily living.

Appendix 4: Supplementary Material

Adjusted Rate Ratios for the Cumulative Burden of Hospitalization, Nursing Home Admissions, and Disability for 3 Joint Trajectories versus No Cognitive Frailty (Reference Group)

Based on the GEE models adjusting for the covariates age, sex, race, education, living alone, number of chronic conditions, and depression symptoms, the adjusted rate ratios (aRRs) for hospitalization were 1.9

(95% confidence interval [CI]: 1.6-2.3) for slow cognitive decline and progressive frailty, 2.1 (1.8-2.6) for rapid cognitive decline and progressive frailty, and 2.1 (1.6-2.9) for cognitive frailty, respectively. The corresponding aRRs (95% CI) for the other 3 trajectories were 7.2 (4.4-11.8), 23.5 (14.4-38.4), and 50.7 (30.5-84.1) for nursing home admission; 7.2 (5.4-9.5), 12.6 (9.5-16.7), and 20.6 (15.7-26.9) for ADL disability; 1.8 (1.6-2.0), 2.2 (2.0-2.5), and 2.3 (2.1-2.6) for IADL disability; and 2.4 (2.1-2.8), 2.7 (2.3-3.2), and 3.1 (2.6-3.6) for mobility disability.
